# Supplementary material for: The clinical utility of dynamic ctDNA monitoring in inoperable localized NSCLC patients
Source: PubMed Central journal article supplement (PMC9118575; doi:10.1186/s12943-022-01590-0), 2022-05-19
Supplement: 12943_2022_1590_MOESM4_ESM.pdf [file 12943_2022_1590_MOESM4_ESM.pdf]

# Supplementary Figure 4

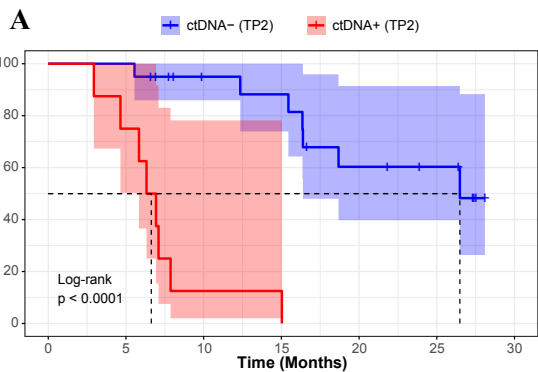

Number at risk

|        |    |    |    |    |   |   |   |
|--------|----|----|----|----|---|---|---|
| ctDNA- | 20 | 20 | 14 | 13 | 8 | 6 | 0 |
| ctDNA+ | 8  | 6  | 1  | 1  | 0 | 0 | 0 |

Time (Months)

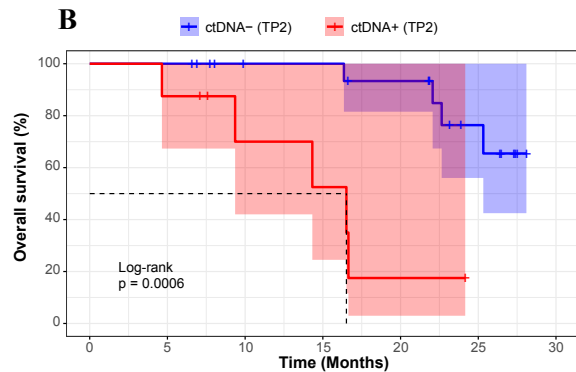

Number at risk

|        |    |    |    |    |    |   |   |
|--------|----|----|----|----|----|---|---|
| ctDNA- | 20 | 20 | 15 | 15 | 13 | 7 | 0 |
| ctDNA+ | 8  | 7  | 4  | 3  | 1  | 0 | 0 |

Time (Months)

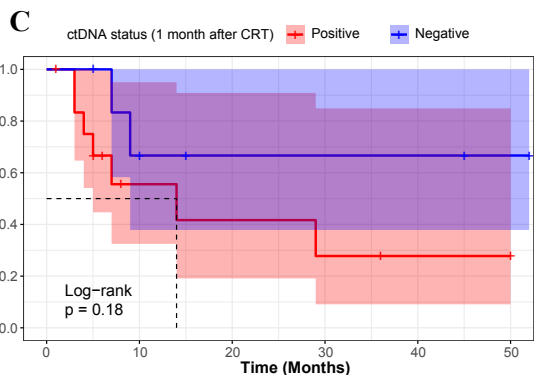

ctDNA status (1 month after CRT)

Positive Negative

|        |    |   |   |   |   |   |
|--------|----|---|---|---|---|---|
| ctDNA+ | 13 | 4 | 3 | 2 | 1 | 1 |
| ctDNA- | 7  | 4 | 2 | 2 | 2 | 1 |

Time (Months)
