# Supplementary material for: The clinical utility of dynamic ctDNA monitoring in inoperable localized NSCLC patients
Source: PubMed Central journal article supplement (PMC9118575; doi:10.1186/s12943-022-01590-0), 2022-05-19

# Supplementary Figure 6

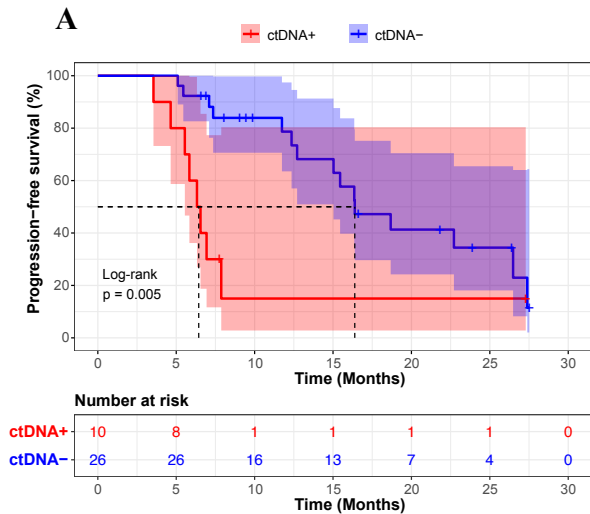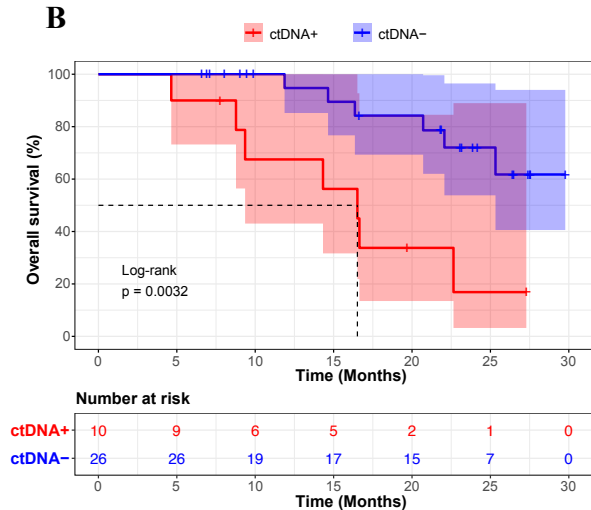

Supplement: 12943_2022_1590_MOESM6_ESM.pdf [file 12943_2022_1590_MOESM6_ESM.pdf]
